# Supplementary material
Source: PubMed Central journal article supplement (PMC4909507)

# Bloch simulation of WURST spin echo train

1D numerical phantom with  $\Delta B_0$  field and linear  $B_1^+$  amplitude field

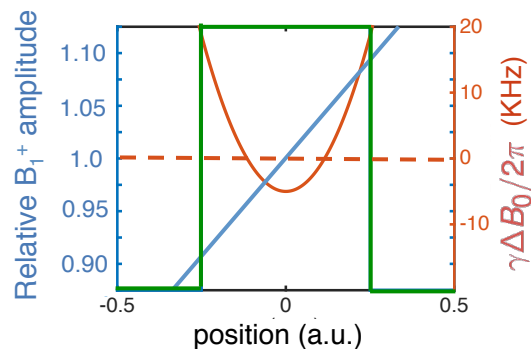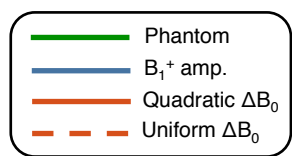

(b)

Quadratic  $\Delta B_0$

Uniform  $B_1^+$  amplitude

$\pm 10\%$  variation in  $B_1^+$  amplitude

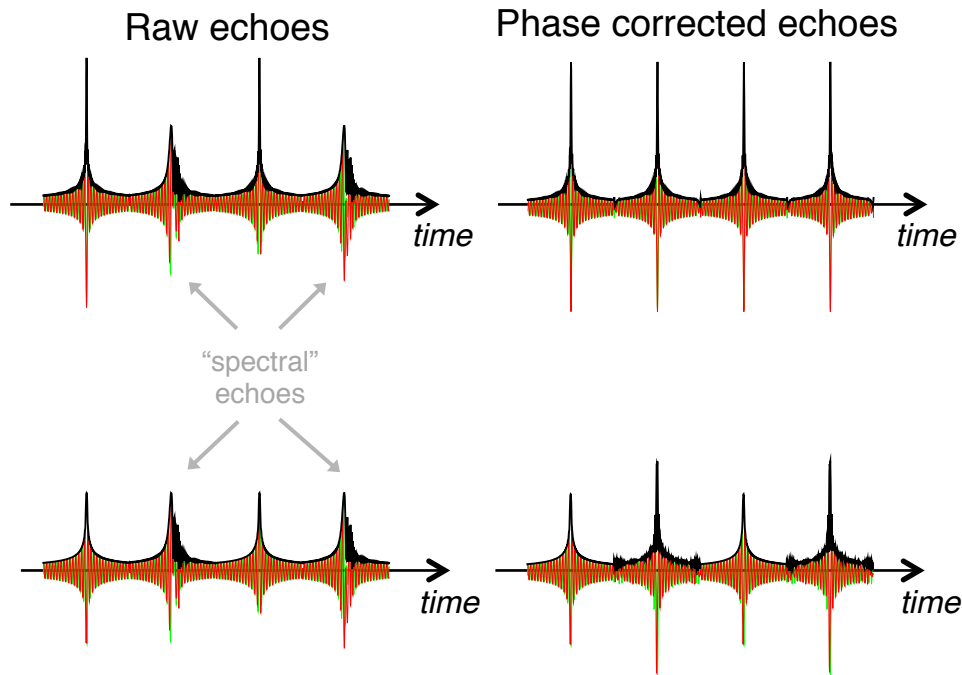

(c)

Uniform  $\Delta B_0$  with  $T_2^*$  envelope

Uniform  $B_1^+$  amplitude

$\pm 10\%$  variation in  $B_1^+$  amplitude

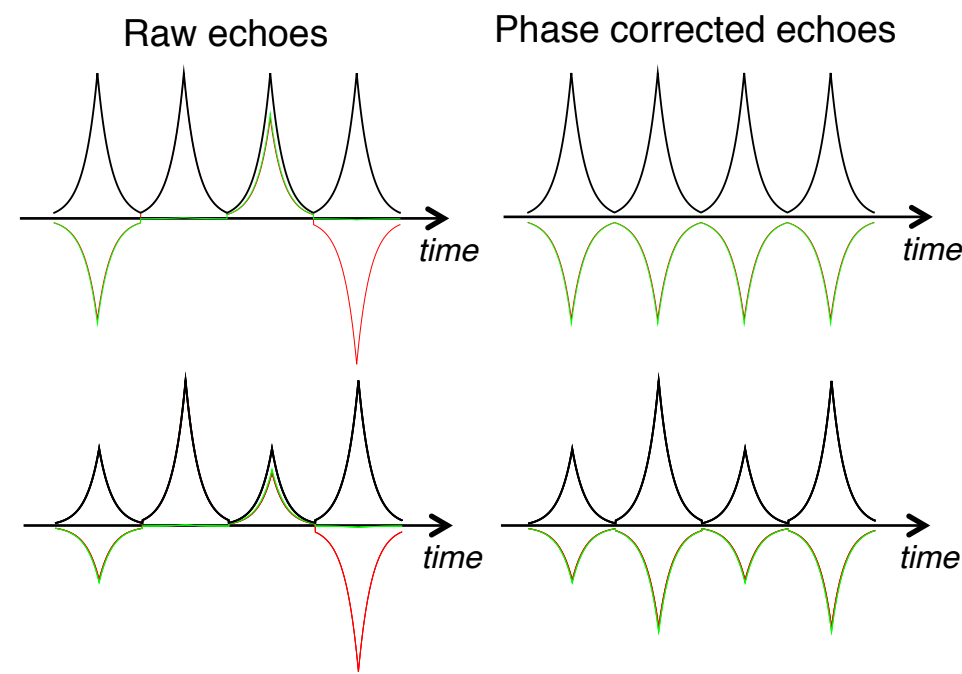

Supplement: NIHMS784748-supplement-3.pdf [file NIHMS784748-supplement-3.pdf]
