# Supplementary material
Source: PubMed Central journal article supplement (PMC4909507)

# Measured TRASE array coil $B_1^+$ field maps

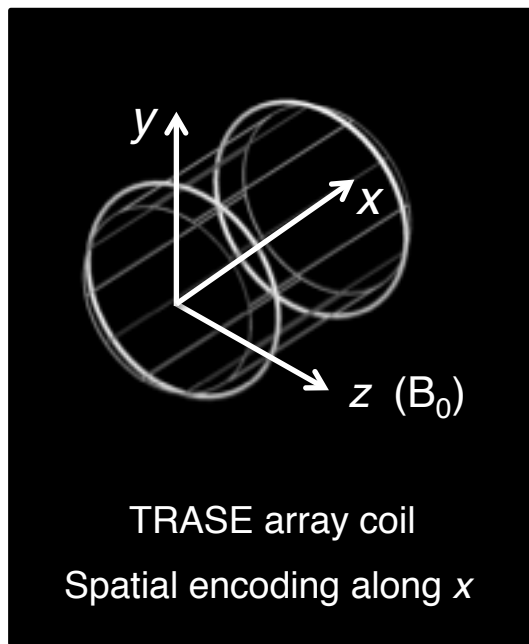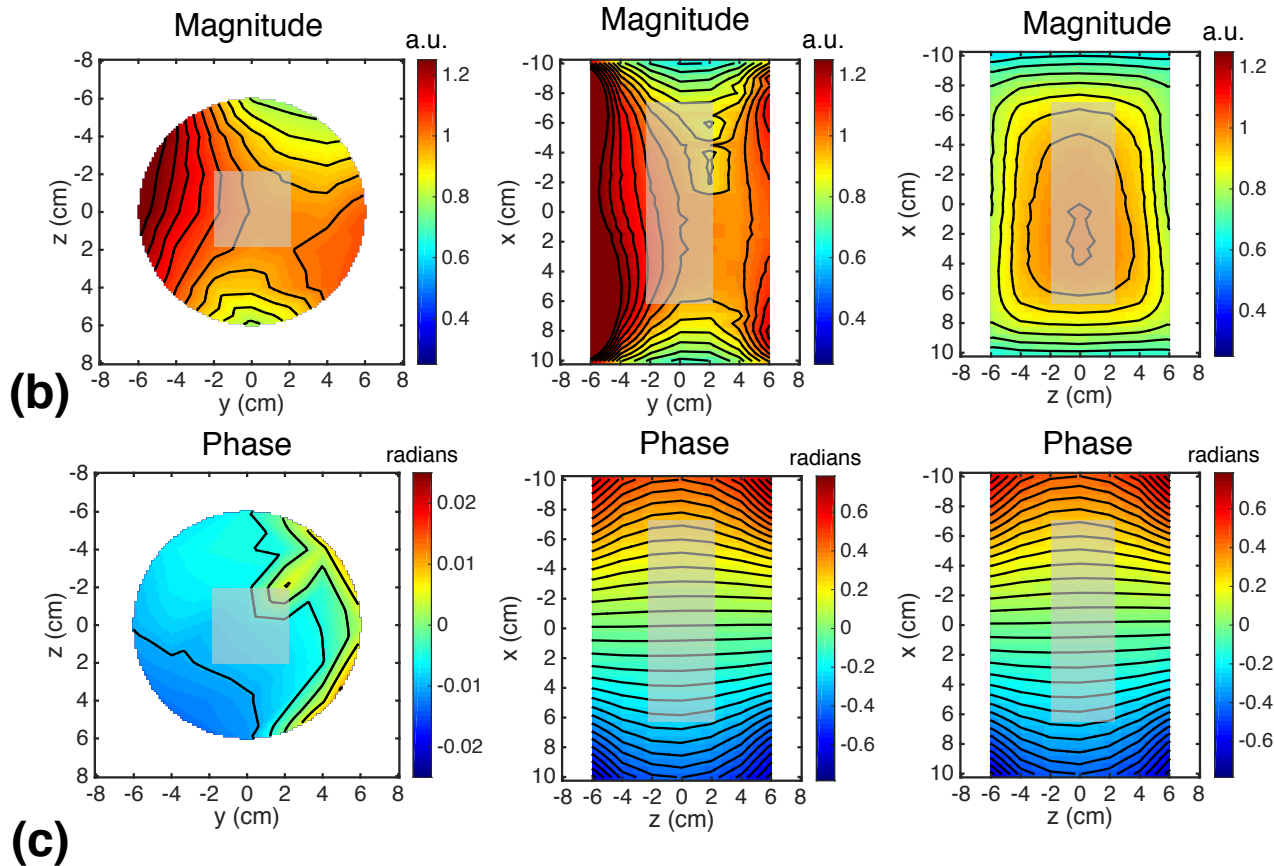

Supplement: NIHMS784748-supplement-1.pdf [file NIHMS784748-supplement-1.pdf]

**TRASE recon without T2' blurring**

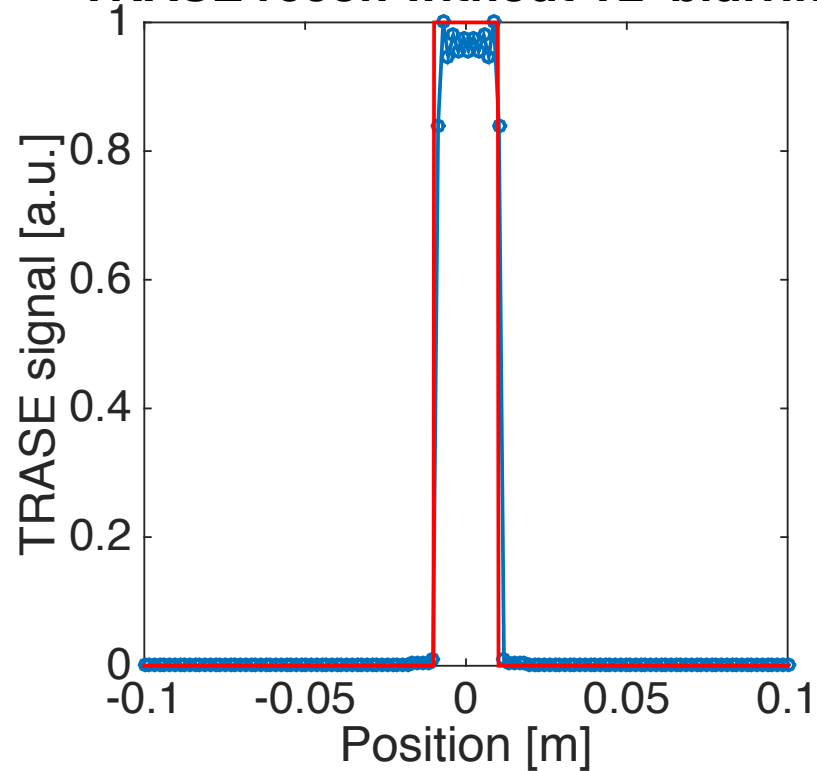

**(a)**

**TRASE recon with T2' blurring**

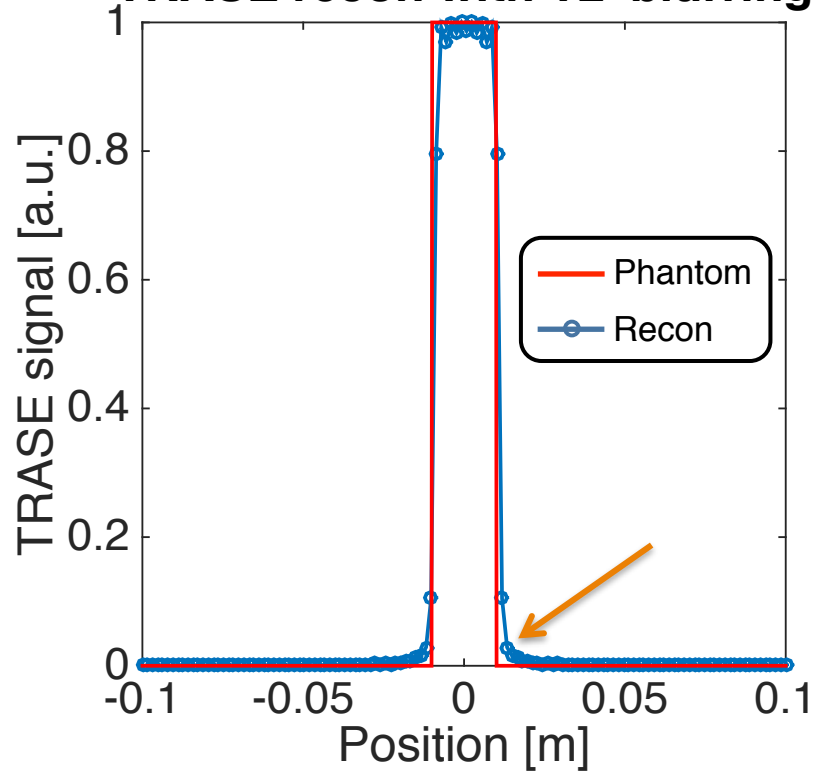

**(b)**

Supplement: NIHMS784748-supplement-2.pdf [file NIHMS784748-supplement-2.pdf]
